# Supplementary material for: Identification of the source of elevated hepatocyte growth factor levels in multiple myeloma patients
Source: PubMed Central journal article supplement (PMC4022385; doi:10.1186/2050-7771-2-8), 2014-04-09
Supplement: 2050-7771-2-8-S1.pdf [file 2050-7771-2-8-S1.pdf]

## Supplementary material

**Supplementary Table 1: Primers for the amplification of the *HGF* promoter, DATE nested**

PCR primers and sequencing primers

| <b>Amplification Primers</b> |      |                                  |     |
|------------------------------|------|----------------------------------|-----|
| <b>2.0kpHGF For</b>          | 5' - | GGAACATGTGATTCTTCTCCTCGTGGGGT    | -3' |
| <b>3.4kpHGF Rev</b>          | 5' - | TGTCAGCCTCTGTCTGGTGTCCCC         | -3' |
| <b>3.3kpHGF For</b>          | 5' - | TCAGGGTCACGGTCAGGCTATGC          | -3' |
| <b>4.7kpHGF Rev</b>          | 5' - | GGCACAGGCAGGGACCAATTCGC          | -3' |
| <b>3.2kpHGF For</b>          | 5' - | CAGAGAGAGCTGATTCTGAGGTCTTC       | -3' |
| <b>4.3kpHGF Rev</b>          | 5' - | CTGCCAAACTCACGAAATACCACAC        | -3' |
| <b>HGF_DATEoutFor</b>        | 5' - | GTCCAAAGCAGCCAAGTTCAGCCAG        | -3' |
| <b>5.5kpHGF Rev</b>          | 5' - | GGGACAGGCTATGGACAATGACTGTTTCTTGG | -3' |
| <b>DATE nested Primers</b>   |      |                                  |     |
|                              |      | As described in (19)             |     |
| <b>HGF_DATEoutFor</b>        | 5' - | GGGACAGGCTATGGACAATGACTGTTTCTTGG | -3' |
| <b>HGF_DATEoutRev</b>        | 5' - | GGGTGTGGTATTGTGGGGCCAAAATAAG     | -3' |
| <b>HGF_DATEinFor</b>         | 5' - | CGTGAGTTTGGCAGTTTGTG             | -3' |
| <b>HGF_DATEinRev</b>         | 5' - | ATGGGCTCAGAGCAGGCAGC             | -3' |
| <b>Sequencing Primers</b>    |      |                                  |     |
| <b>2.7kpHGFSeq1</b>          | 5' - | ACCCGAGAGCCTTTAGAAC              | -3' |
| <b>2.7kpHGFSeq2</b>          | 5' - | TCATTTTTCTGAGCCCCTAC             | -3' |
| <b>2.7kpHGFSeq3</b>          | 5' - | AGTTACCAGAGCATCCACC              | -3' |
| <b>pHGF-5-Seq</b>            | 5' - | GGTGAAAGTCAGTCCTAACCAG           | -3' |
| <b>pHGF-Seq3</b>             | 5' - | GTGCCTTGATTTAGCCATTG             | -3' |
| <b>pHGFSeqRev2</b>           | 5' - | TGGCTAAATCAAGGCACAG              | -3' |
| <b>pHGFSeqRev3</b>           | 5' - | AACAGTCATTGTCCATAGCC             | -3' |
| <b>pHGFSeqRev4</b>           | 5' - | CAAAGTGTAAGTGGAAGATGAGG          | -3' |
| <b>pHGFSeqRev5</b>           | 5' - | TTGTCAGCCTCTGTCTGGTGTCC          | -3' |
| <b>pHGFSeqRev6</b>           | 5' - | CCATTCCAAGAAGGTCC                | -3' |

**Supplementary Table 2: Cytogenetic status of the patient samples**

| Patient | Age at sampling | Gender | Hyperdiploidy                                                                       |                                                     | Other Cytogenetics                                                       | Treatment status                                      | % PC in BM |
|---------|-----------------|--------|-------------------------------------------------------------------------------------|-----------------------------------------------------|--------------------------------------------------------------------------|-------------------------------------------------------|------------|
| MM 1    | 55              | M      | 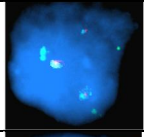   | Three copies <i>HGF</i><br>Three copies <i>CEP7</i> | N.A.                                                                     | Newly Diagnosed / Untreated                           | 17         |
| MM 2    | 74              | M      |    | Two copies <i>HGF</i>                               | Normal <i>IGH</i> , del17<br>Positive del13                              | Newly Diagnosed / Untreated                           | 66         |
| MM 3    | 65              | M      |    | Two copies <i>HGF</i>                               | Normal <i>IGH</i> , del13 and del17                                      | Newly Diagnosed / Untreated                           | 60         |
| MM 4    | 81              | M      |    | One copy <i>HGF</i>                                 | t(14;16)<br>Normal del13 and del17                                       | Newly Diagnosed / Untreated                           | 95         |
| MM 5    | 72              | M      |    | Two copies <i>HGF</i>                               | Normal <i>IGH</i> , del13, del17, <i>IGK</i> , <i>IGL</i>                | Newly Diagnosed / Untreated                           | 60         |
| MM 6    | 77              | M      |   | Two copies <i>HGF</i>                               | t(11;14)<br>Normal del13<br>Normal del17, 1p & gain 1q                   | Newly Diagnosed / Untreated                           | 20         |
| MM 7    | 65              | F      |  | One copy <i>HGF</i>                                 | t(11,14)<br>Positive del13<br>Normal del17                               | Newly Diagnosed / Untreated<br>MGUS diagnosed in 2004 | 45         |
| MM 8    | 72              | M      |  | Three copies <i>HGF</i>                             | Normal <i>IGH</i> & del17<br>Positive del13<br>Normal 1p & gain 1q       | Diagnosed in August 2006 / Treated                    | >95        |
| MM 9    | 81              | M      |  | Two copies <i>HGF</i>                               | Normal <i>IGH</i> , del13, del17, 1p & 1q                                | N.A.                                                  | N.A.       |
| MM 10   | 62              | M      |  | Two copies <i>HGF</i>                               | t(11;14)<br>Positive del13<br>Normal del17, 1p & 1q                      | Newly Diagnosed / Untreated                           | 40         |
| MM 11   | 73              | M      |  | Three copies <i>HGF</i>                             | Normal <i>IGH</i> , del17, 1p & 1q<br>Positive del13<br><i>IGK</i> split | Newly Diagnosed / Untreated                           | >30        |
| MM 12   | 67              | M      | N.A.                                                                                | N.A.                                                | t(4;14), t(2;8)<br>Positive del13<br>Normal del17                        | Newly Diagnosed / Untreated                           | 5-10       |
| MM 13   | 71              | M      | N.A.                                                                                | Three copies <i>HGF</i>                             | Normal <i>IGH</i> , del17, 1p & 1q<br>Positive del13                     | Newly Diagnosed / Untreated                           | 28         |

**Supplementary Table 2: Continued**

| Patient | Age at sampling | Gender | Hyperdiploidy                                                                       |                                                     | Other Cytogenetics                                                                                | Treatment status                 | % PC in BM |
|---------|-----------------|--------|-------------------------------------------------------------------------------------|-----------------------------------------------------|---------------------------------------------------------------------------------------------------|----------------------------------|------------|
| MM 14   | 81              | F      | 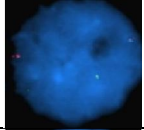   | Two copies <i>HGF</i>                               | Unknown <i>IGH</i> split<br>Positive del13<br>Normal del17, 1p & 1q                               | Newly Diagnosed /<br>Untreated   | 60         |
| MM 15   | 56              | M      |    | Two copies <i>HGF</i>                               | Normal <i>IGH</i> , del13,<br>del17, 1p & 1q                                                      | Newly Diagnosed /<br>Untreated   | 31         |
| MM 16   | 63              | M      |    | One copy <i>HGF</i>                                 | Normal <i>IGH</i> , del13<br>and del17                                                            | Newly Diagnosed /<br>Untreated   | 8          |
| MM 17   | 57              | M      |    | Three copies <i>HGF</i>                             | Normal <i>IGH</i> , del13,<br><i>MYC</i> , 1p & gain 1q                                           | Newly Diagnosed /<br>Untreated   | 5          |
| MM 18   | 80              | F      |    | Two copies <i>HGF</i>                               | Normal <i>IGH</i> , del 17,<br>1p, 1q, <i>CEP15</i><br>Positive del13<br>Triploid 9               | Diagnosed in 2005 /<br>Untreated | 13         |
| MM 19   | 67              | F      |   | Two copies <i>HGF</i>                               | t(11;14)<br>Positiv del13<br>Normal del17, 1p &<br>gain 1q                                        | Newly Diagnosed /<br>Untreated   | 10         |
| MM 20   | 80              | F      | N.A.                                                                                | N.A.                                                | Normal <i>IGH</i><br>del17, <i>MYC</i> , 1p, 1q,<br><i>CEP9</i> , <i>CEP19</i> ,<br>positiv del13 | Newly Diagnosed /<br>Untreated   | 44         |
| MM 21   | 56              | M      | N.A.                                                                                | N.A.                                                | t(4;14)<br>Positiv del13 and<br>del17, normal 1p<br>gain 1q                                       | Newly Diagnosed /<br>Untreated   | 7          |
| MM 22   | 53              | M      | N.A.                                                                                | N.A.                                                | Unknown <i>IGH</i> split<br>Normal del13 and<br>del17                                             | N.A.                             | N.A.       |
| MM 23   | 60              | M      |  | Two copies <i>HGF</i>                               | Unknown <i>IGH</i> split<br>Positive del13 and<br>del17<br>Normal 1q & 1q                         | N.A.                             | N.A.       |
| MM 24   | 68              | M      | N.A.                                                                                | N.A.                                                | t(11;14)<br>Normal del13 and<br>del17, deletion 1p &<br>gain 1q                                   | N.A.                             | N.A.       |
| MM 25   | 72              | M      |  | Three copies <i>HGF</i><br>Three copies <i>CEP7</i> | t(11;14)<br>Normal del13<br>del17, 1p & 1q                                                        | N.A.                             | N.A.       |
| MM 26   | 36              | M      |  | Two copies <i>HGF</i>                               | t(4;14)<br>Positive del13<br>Normal del17, 1p &<br>1q                                             | Newly Diagnosed /<br>Untreated   | N.A.       |

**Supplementary Table 2: Continued**

| Patient | Age at sampling | Gender | Hyperdiploidy                                                                                             | Other Cytogenetics                                         | Treatment status                                                        | % PC in BM |
|---------|-----------------|--------|-----------------------------------------------------------------------------------------------------------|------------------------------------------------------------|-------------------------------------------------------------------------|------------|
| MM 27   | 53              | F      | 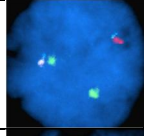 Two copies <i>HGF</i>   | t(11;14)<br>Positive del13<br>del17, del 1p, Normal 1q     | Cells isolated after first CyDex treatment / Serum withdrawn after ASCT | N.A.       |
| MM 28   | 59              | M      |  Three copies <i>HGF</i> | Unknown <i>IGH</i> split<br>Normal del13<br>Positive del17 | N.A.                                                                    | N.A.       |
| MM 29   | 66              | F      | N.A.                                                                                                      | N.A.                                                       | t(11;14)<br>Normal del13<br>del17,1p & 1q                               | N.A.       |
| MM 30   | 58              | M      |  Three copies <i>HGF</i> | t(11;14)<br>Normal del13<br>del17,1p & 1q                  | N.A.                                                                    | N.A.       |

M Male  
 F Female  
 BM Bone Marrow  
 N.A. Not Analyzed  
 PC Plasma cells  
 CyDex Cyclophosphamide and Dexamethasone treatment (proceeds ASCT)  
 ASCT Autologous Stem Cell Therapy
